# Supplementary material for: Compound-specific stable isotope analyses in Falkland Islands seabirds reveal seasonal changes in trophic positions
Source: PubMed Central journal article supplement (PMC7160925; doi:10.1186/s12898-020-00288-5), 2020-04-15

## Additional file 1

### Title: Compound-specific stable isotope analyses in Falkland Islands seabirds reveal seasonal changes in trophic positions

Authors: Petra Quillfeldt & Juan F. Masello

**Table S1.** Samples included in this study. All historical samples were collected in the Falkland/Malvinas area (<sup>a</sup> locality unknown, <sup>b</sup> Stanley area and Beaver Island, East Falkland, <sup>c</sup> offshore waters west of the archipelago, <sup>d</sup> Grand Jason, West Falklands, <sup>e</sup> Fox Bay, West Falklands) and are deposited in the American Museum of Natural History (AMNH) and the British Natural History Museum (BNHM).

| Species               | Tissue                           | Year              | Sample size | Origin           |
|-----------------------|----------------------------------|-------------------|-------------|------------------|
| Rockhopper penguin    | Feather (adults, recent)         | 2009              | 5           | New Island       |
|                       | Feather (adults, historic)       | 1841 <sup>a</sup> | 1           | BNHM             |
|                       |                                  | 1876 <sup>a</sup> | 2           | BNHM             |
|                       | Red blood cells (adults, recent) | 2009              | 5           | New Island       |
| Gentoo penguin        | Feather (adults, recent)         | 2007              | 5           | New Island       |
|                       | Feather (adults, historic)       | 1915 <sup>b</sup> | 5           | AMNH             |
|                       | Red blood cells (adults, recent) | 2009              | 5           | New Island       |
| Magellanic penguin    | Feather (adults, recent)         | 2009              | 5           | New Island       |
|                       | Feather (adults, historic)       | 1915 <sup>b</sup> | 5           | AMNH             |
|                       | Red blood cells (adults, recent) | 2009              | 5           | New Island       |
| Thin-billed prion     | Feather (adults, recent)         | 2006              | 9           | New Island       |
|                       |                                  | 2007              | 2           | New Island       |
|                       | Feather (adults, historic)       | 1915 <sup>c</sup> | 10          | AMNH             |
|                       | Feather (chicks, recent)         | 2007              | 5           | New Island       |
|                       | Feather (adults, induced)        | 2007              | 8           | New Island       |
|                       | Red blood cells (chicks, recent) | 2007              | 5           | New Island       |
|                       | Egg membrane                     | 2007              | 6           | New Island       |
| Wilson's storm-petrel | Feather (adults, recent)         | 2011              | 4           | Beauchene Island |
|                       | Feather (adults, historic)       | 1924 <sup>d</sup> | 2           | BNHM             |
|                       |                                  | 1930 <sup>e</sup> | 1           | BNHM             |

**Table S2.****Reference material values measured in the analytical run carried out for this study.****S2a**

|           | <b>Reference materials a - mixtures composed of pure amino acids</b> |                                 |           |                                  |                                 |           |                                  |                                 |           |
|-----------|----------------------------------------------------------------------|---------------------------------|-----------|----------------------------------|---------------------------------|-----------|----------------------------------|---------------------------------|-----------|
|           | UCD AA 1                                                             |                                 |           | UCD AA 2                         |                                 |           | UCD AA 3                         |                                 |           |
| <b>AA</b> | <b>Known<br/>d<sup>15</sup>N</b>                                     | <b>Mean<br/>d<sup>15</sup>N</b> | <b>SD</b> | <b>Known<br/>d<sup>15</sup>N</b> | <b>Mean<br/>d<sup>15</sup>N</b> | <b>SD</b> | <b>Known<br/>d<sup>15</sup>N</b> | <b>Mean<br/>d<sup>15</sup>N</b> | <b>SD</b> |
| Ala       | -6.72                                                                | -7.09                           | 0.48      | 41.13                            | 41.40                           | 0.27      | 0.83                             | 0.36                            | 0.68      |
| Asp       | -2.34                                                                | -2.43                           | 0.30      | -2.29                            | -2.26                           | 0.93      | -3.18                            | -3.33                           | 0.61      |
| Glu       | -4.17                                                                | -4.18                           | 0.77      | 47.57                            | 48.08                           | 0.41      | 25.86                            | 25.60                           | 0.85      |
| Gly       | 0.82                                                                 | 0.99                            | 0.50      | 0.73                             | 0.97                            | 0.57      | 1.62                             | 1.54                            | 0.64      |
| Ile       | 2.53                                                                 | 2.76                            | 0.32      | -3.53                            | -3.62                           | 0.35      | -3.09                            | -2.76                           | 0.61      |
| Leu       | 9.24                                                                 | 9.71                            | 0.39      | -4.29                            | -5.01                           | 0.50      | 4.57                             | 3.49                            | 0.65      |
| Lys       | -1.36                                                                | -0.71                           | 0.34      | 0.47                             | 0.80                            | 1.09      | -1.37                            | -0.97                           | 1.14      |
| Met       | -1.69                                                                | -1.85                           | 0.43      | 2.06                             | 2.25                            | 0.51      | -0.47                            | -0.62                           | 0.57      |
| Phe       | -1.14                                                                | -1.05                           | 0.39      | 28.36                            | 28.21                           | 0.60      | 0.56                             | 0.68                            | 0.51      |
| Pro       | -1.44                                                                | -1.50                           | 0.38      | -0.12                            | 0.06                            | 0.84      | 26.38                            | 26.61                           | 0.25      |
| Thr       | -1.30                                                                | -1.40                           | 0.82      | 50.19                            | 49.44                           | 0.48      | -7.08                            | -7.21                           | 1.19      |
| Val       | 5.30                                                                 | 5.63                            | 0.42      | 41.13                            | 41.40                           | 0.27      | 26.52                            | 27.19                           | 0.50      |

**S2b**

|           | <b>Reference materials b – natural materials</b> |           |                                 |           |
|-----------|--------------------------------------------------|-----------|---------------------------------|-----------|
|           | RWB = baleen                                     |           | MMS = fish muscle               |           |
| <b>AA</b> | <b>Mean<br/>d<sup>15</sup>N</b>                  | <b>SD</b> | <b>Mean<br/>d<sup>15</sup>N</b> | <b>SD</b> |
| Ala       | 14.15                                            | 0.51      | 27.84                           | 0.34      |
| Asp       | 11.69                                            | 0.70      | 29.86                           | 0.94      |
| Glu       | 16.23                                            | 0.76      | 29.51                           | 0.83      |
| Gly       | 5.53                                             | 0.51      | 4.93                            | 0.37      |
| Ile       | 16.62                                            | 0.32      | 29.35                           | 0.23      |
| Leu       | 14.85                                            | 0.38      | 27.57                           | 0.32      |
| Lys       | 5.68                                             | 1.06      | 8.18                            | 1.09      |
| Met       | 8.37                                             | 0.82      | 12.94                           | 0.62      |
| Phe       | 5.31                                             | 0.58      | 7.30                            | 0.59      |
| Pro       | 16.02                                            | 0.43      | 22.44                           | 0.47      |
| Thr       | -15.42                                           | 1.68      | -15.48                          | 1.69      |
| Val       | 17.82                                            | 0.39      | 29.68                           | 0.32      |

**QC materials**

- L-Norleucine was used as an internal standard and used to calculate provisional values for each sample.
- Two mixtures composed of pure amino acids of calibrated d13C and d15N (UCD AA 1, UCD AA 2) were co-measured with samples.
- One mixture is used for final isotopic calibration of each amino acid (UCD AA 1), while the other serves as the scale normalization standard (UCD AA 2).
- Additionally, a third mixture (UCD AA 3) serves as the primary quality assurance standard (unused in corrections), while two well-described, natural materials are co-measured as secondary quality assurance materials (Here: RWB = baleen, MMS = fish muscle).

**Additional Quality Assurance Criteria**

- Average standard deviation of duplicate measurements will be no greater than +/- 1.25 across amino acids (within samples) and across samples (within amino acids).
- Standard deviation of individual amino acids within samples shall be no greater than +/- 1.5, except for Lys, Thr, and Tyr. Amino acids present at low concentrations in samples may not meet this criteria based on sample composition. All measures also apply to all external reference mixtures and materials.

**Fig. S1.** Comparison of trophic positions (TP) calculated using the Glx and Phe approach versus the multiple amino acid approach:

TP-multi\_TDF: Trophic position calculated based on Glx and Phe, as detailed in methods,

TP-7AAS: Trophic position based on all available data, namely Phe as source amino acid, and the six trophic amino acids, Glx, Ala, Leu, Ile, Pro, Asp.

$$\text{TP-7AAS} = 1 + \left( \frac{(\delta^{15}\text{N}_{\text{Glx}} + \delta^{15}\text{N}_{\text{Ala}} - 0.59 + \delta^{15}\text{N}_{\text{Leu}} + 2.93 + \delta^{15}\text{N}_{\text{Ile}} - 2.63 + \delta^{15}\text{N}_{\text{Pro}} + 1.39 + \delta^{15}\text{N}_{\text{Asp}} + 1.78) / 6 - \delta^{15}\text{N}_{\text{Phe}} / 5.9}{0.34} \right)$$

The correction values were taken from the intercepts given in Nielsen et al. (2015), ESM, Appendix C.

Nielsen JM, Popp BN, Winder M: **Meta-analysis of amino acid stable nitrogen isotope ratios for estimating trophic position in marine organisms.** *Oecologia* 2015, 178: 631-642.

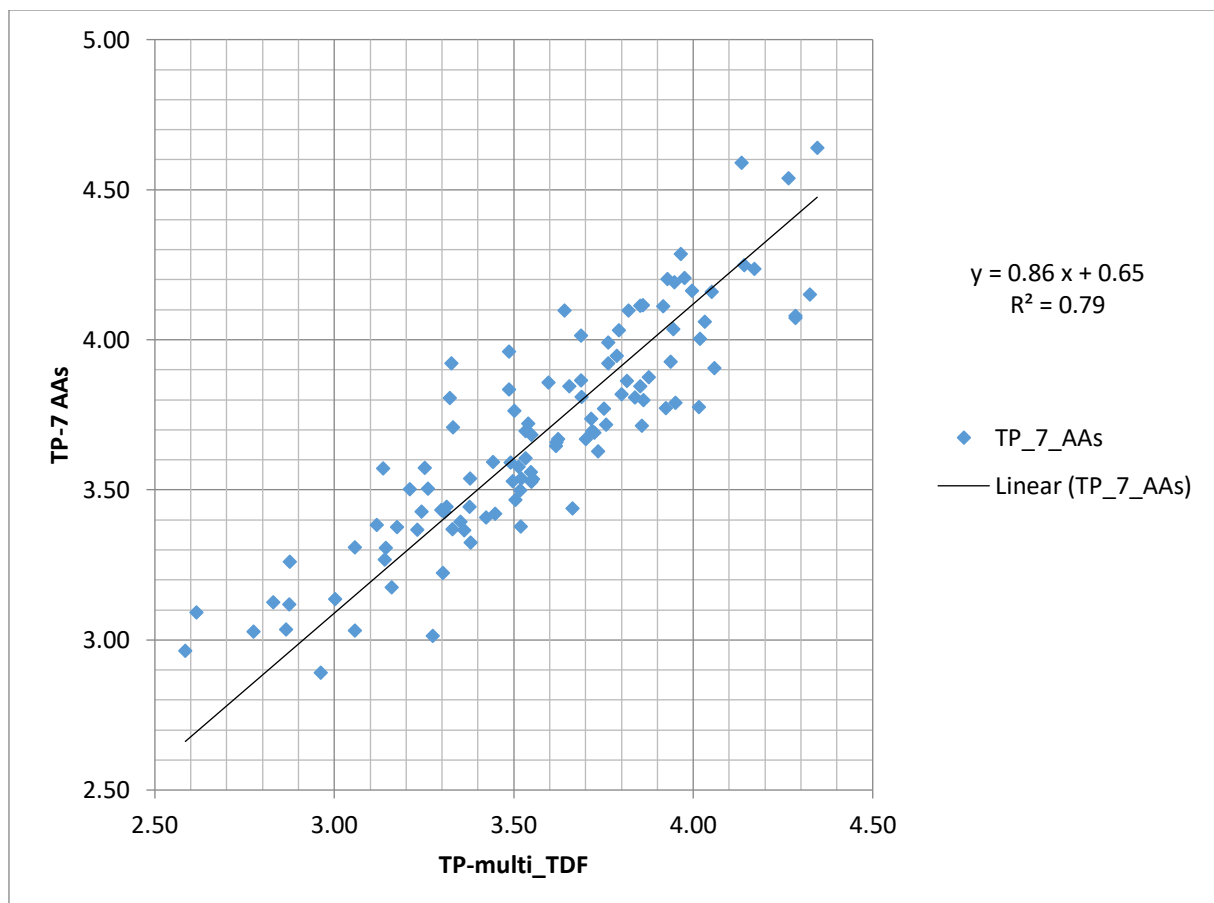

Supplement: 12898_2020_288_MOESM1_ESM.pdf [file 12898_2020_288_MOESM1_ESM.pdf]
